# Supplementary material
Source: Springer Nature journal article supplement (https://www.springermedizin.de/resource/supplementary/12937_2013_688_MOESM1_ESM.pdf/25653612)

CV of protein distribution

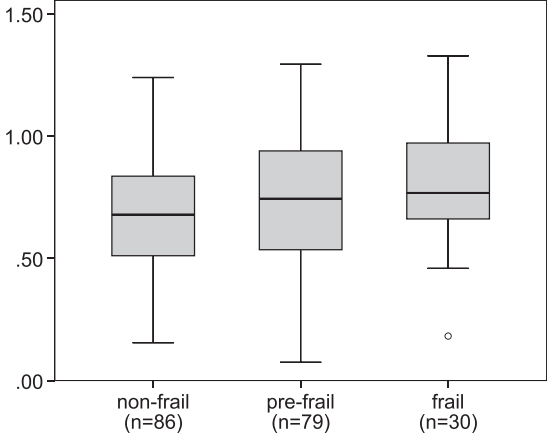

Supplement: MOESM1 [file 25653612]
